# Supplementary material for: TUBG1 missense variants underlying cortical malformations disrupt neuronal locomotion and microtubule dynamics but not neurogenesis
Source: PubMed Central journal article supplement (PMC6513894; doi:10.1038/s41467-019-10081-8), 2019-05-13
Supplement: 41467_2019_10081_MOESM4_ESM.pdf [file 41467_2019_10081_MOESM4_ESM.pdf]

## Description of Additional Supplementary Files

File Name: Supplementary Data 1

Description: List and description of the 166 neuroanatomical parameters quantified in the morphometric analysis of adult TUBG1 knock-in mice.

File Name: Supplementary Data 2

Description: List and description of the 40 neuroanatomical parameters studied in the morphometric analysis of postnatal day 0 TUBG1 knock-in mice.

File Name: Supplementary Data 3

Description: A detailed description of statistics behind all graphical representation of data.

File Name: Supplementary Movie 1

Description: **Migration of pyramidal neurons electroporated with Control Empty-vector.** Neuronal precursors were electroporated at E14.5 with the DCX control Empty-vector along with a GFP reporter gene under the control of a NeuroD promoter. E16.5 brain slices were cultured for one day, and GFP expressing neurons were then imaged for 10 hours.

File Name: Supplementary Movie 2

Description: **Migration of pyramidal neurons electroporated with TUBG1-WT.** Neuronal precursors were electroporated at E14.5 with a *TUBG1*-WT construct under the control of a DCX promoter along with a GFP reporter gene under the control of a NeuroD promoter. E16.5 brain slices were cultured for one day, and GFP expressing neurons were then imaged for 10 hours.

File Name: Supplementary Movie 3

Description: **Migration of pyramidal neurons electroporated with TUBG1-Tyr92Cys.** Neuronal precursors were electroporated at E14.5 with a *TUBG1*-Tyr92Cys construct under the control of a DCX promoter along with a GFP reporter gene under the control of a NeuroD promoter. E16.5 brain slices were cultured for one day, and GFP expressing neurons were then imaged for 10 hours.

File Name: Supplementary Movie 4

Description: **Migration of pyramidal neurons electroporated with TUBG1 Thr331Pro.** Neuronal precursors were electroporated at E14.5 with a *TUBG1*-Thr331Pro construct under the control of a DCX promoter along with a GFP reporter gene under the control of a NeuroD promoter. E16.5 brain slices were cultured for one day, and GFP expressing neurons were then imaged for 10 hours.

File Name: Supplementary Movie 5

Description: **Microtubules dynamics in Control HeLa cells:** Representative time-lapse movie of HeLa cells transfected with EB3-GFP and the corresponding control Empty-vector. Images were collected every 500ms for 2 min.

File Name: Supplementary Movie 6

Description: **Microtubules dynamics in TUBG1-WT HeLa cells.** Representative time-lapse movie of HeLa cells transfected with EB3-GFP and co-transfected with *TUBG1*-WT. Images were collected every 500ms for 2 min.

File Name: Supplementary Movie 7

Description: **Microtubules dynamics in TUBG1 Tyr92Cys HeLa cells.** Representative timelapse movie of HeLa cells transfected with EB3-GFP and co-transfected with *TUBG1*-Tyr92Cys. Images were collected every 500ms for 2 min.

File Name: Supplementary Movie 8

Description: **Microtubules dynamics in TUBG1 Ser259Leu HeLa cells.** Representative time-lapse movie of HeLa cells transfected with EB3-GFP and co-transfected with *TUBG1*-Ser25.9Leu. Images were collected every 500ms for 2 min.

File Name: Supplementary Movie 9

Description: **Microtubules dynamics in TUBG1 Thr331Pro HeLa cells.** Representative time-lapse movie of HeLa cells transfected with EB3-GFP and co-transfected with *TUBG1*-Thr331Pro Images were collected every 500ms for 2 min.

File Name: Supplementary Movie 10

Description: **Microtubules dynamics in TUBG1 Leu387Pro HeLa cells.** Representative time-lapse movie of HeLa cells transfected with EB3-GFP and co-transfected with *TUBG1*-Leu387Pro. Images were collected every 500ms for 2 min.

File Name: Supplementary Movie 11

Description: **Microtubules dynamics in Control 1 fibroblasts.** Representative time-lapse movie of Control-1 fibroblasts transfected with EB3-GFP. Images were collected every 500ms for 2 min.

File Name: Supplementary Movie 12

Description: **Microtubules dynamics in Control 2 fibroblasts.** Representative time-lapse movie of Control-2 fibroblasts transfected with EB3-GFP. Images were collected every 500ms for 2 min.

File Name: Supplementary Movie 13

Description: **Microtubules dynamics in Control 3 fibroblasts.** Representative time-lapse movie of Control-3 fibroblasts transfected with EB3-GFP. Images were collected every 500ms for 2 min.

File Name: Supplementary Movie 14

Description: **Microtubules dynamics in subject-derived TUBG1-Tyr92Cys fibroblasts.** Representative time-lapse movie of subject-derived fibroblasts carrying the Tyr92Cys mutation and transfected with EB3-GFP. Images were collected every 500ms for 2 min.

File Name: Supplementary Movie 15

Description: **Microtubules dynamics in subject-derived TUBG1-Thr331Pro fibroblasts.** Representative time-lapse movie of subject-derived fibroblasts carrying the Thr331Pro mutation and transfected with EB3-GFP. Images were collected every 500ms for 1 min.

File Name: Supplementary Movie 16

Description: **Migration of pyramidal neurons in *Tubg1* WT mice.** Neuronal precursors of *Tubg1* WT mice were electroporated at E14.5 with a GFP reporter gene under the control of a NeuroD promoter. E16.5 brain slices were cultured for one day, and GFP expressing neurons were then imaged for 10 hours.

File Name: Supplementary Movie 17

Description: **Migration of pyramidal neurons in *Tubg1*<sup>Y92C/+</sup> mice.** Neuronal precursors of *Tubg1*<sup>Y92C/+</sup> mice were electroporated at E14.5 with a GFP reporter gene under the control of a NeuroD promoter. E16.5 brain slices were cultured for one day, and GFP expressing neurons were then imaged for 10 hours.
